# Supplementary material
Source: Springer Nature journal article supplement (https://www.springermedizin.de/resource/supplementary/12889_2010_3131_MOESM2_ESM.pdf/9488232)

■ FIN-D2D beginning 
 ■ FIN-D2D end 
 ■ Control beginning 
 ■ Control end

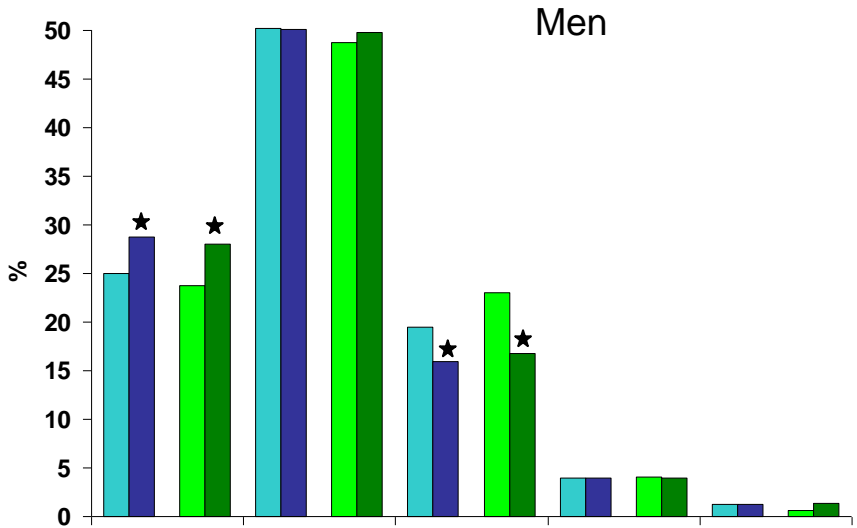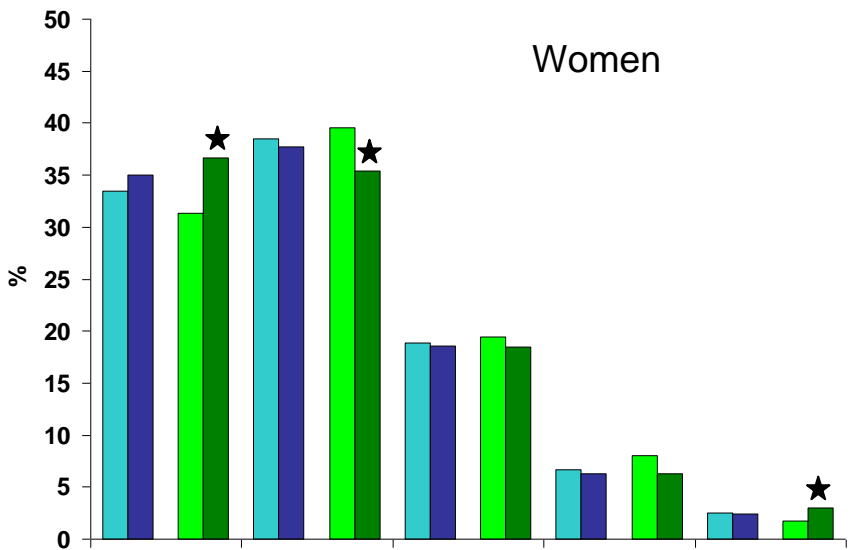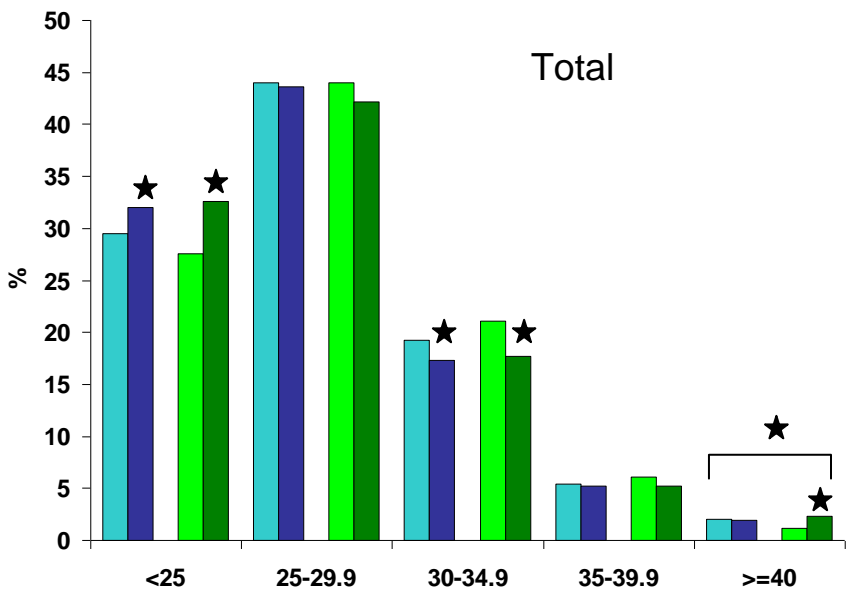

Supplement: MOESM2 [file 9488232]
